32. Toledo P, McCarthy RJ, Hewlett BJ, Fitzgerald PC, Wong CA: The accuracy of blood loss estimation after simulated vaginal delivery. *Anesth Analg* 2007; 105:1736–40
33. Sarna MC, Soni AK, Gomez M, Oriol NE: Intravenous oxytocin in patients undergoing elective cesarean section. *Anesth Analg* 1997; 84:753–6
34. Munn MB, Owen J, Vincent R, Wakefield M, Chestnut DH, Hauth JC: Comparison of two oxytocin regimens to prevent uterine atony at cesarean delivery: A randomized controlled trial. *Obstet Gynecol* 2001; 98:386–90
35. Sartain JB, Barry JJ, Howat PW, McCormack DI, Bryant M: Intravenous oxytocin bolus of 2 units is superior to 5 units during elective cesarean section. *Br J Anaesth* 2008; 101:822–6
36. Svanström MC, Biber B, Hanes M, Johansson G, Näslund U, Bålfors EM: Signs of myocardial ischaemia after injection of oxytocin: A randomized double-blind comparison of oxytocin and methylethylmethylmethane during caesarean section. *Br J Anaesth* 2008; 100:683–9
37. Fortner CL, Manley ES Jr, Woodbury RA: Effects of synthetic oxytocin with and without preservatives upon coronary blood flow in the dog. *J Pharmacol Exp Ther* 1969; 165:258–66
38. Jonsson M, Hanson U, Lidell C, Nordén-Lindeberg S: ST depression at caesarean section and the relation to oxytocin dose. A randomised controlled trial. *BJOG* 2010; 117:76–83

## ANESTHESIOLOGY REFLECTIONS FROM THE WOOD LIBRARY-MUSEUM

### Laughing Gas for the “Pulpit Clown”?

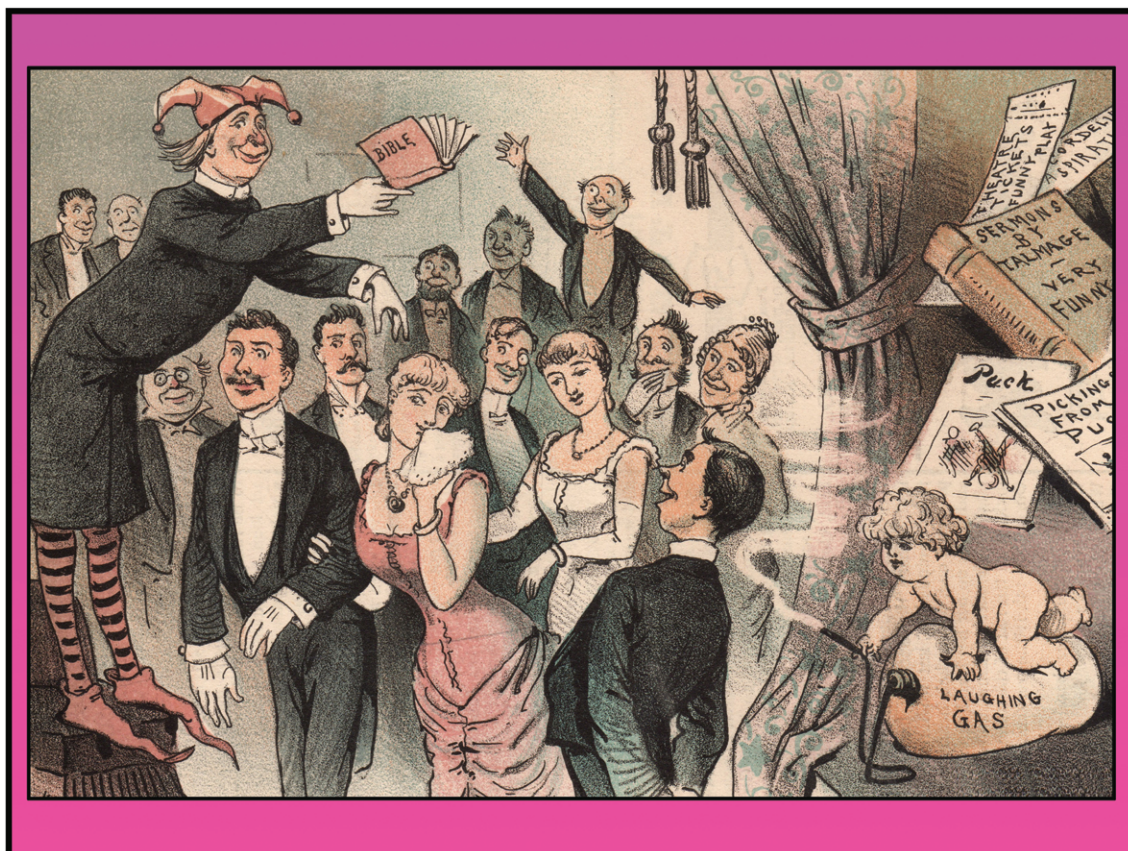

Nicknamed the “pulpit clown” by his detractors, Reverend Doctor Thomas De Witt Talmage (1832–1902) was a clergyman whose fiery sermons and theatrical gestures “entertained” parishioners and visitors by the thousands on Sundays in Brooklyn, New York, from 1869 to 1894. In this illustration from the irreverent American magazine *Puck*, the “pulpit clown” is seen preaching to congregation members dressed more as if they were attending the opera. In the lower right, a mischievous cherub is depicted releasing a bag of laughing gas from behind the curtain. (Copyright © the American Society of Anesthesiologists, Inc.)

George S. Bause, M.D., M.P.H., Honorary Curator, ASA's Wood Library-Museum of Anesthesiology, Schaumburg, Illinois, and Clinical Associate Professor, Case Western Reserve University, Cleveland, Ohio. UJYC@aol.com.
